# Supplementary material
Source: PubMed Central journal article supplement (PMC2775843)
Supplement: mmc1.pdf [file mmc1.pdf]

## Supplemental Data

*AJHG*, Volume 85

# A Genome-wide Association Study of Lung Cancer

## Identifies a Region of Chromosome 5p15

### Associated with Risk for Adenocarcinoma

Maria Teresa Landi, Nilanjan Chatterjee, Kai Yu, Lynn R. Goldin, Alisa M. Goldstein, Melissa Rotunno, Lisa Mirabello, Kevin Jacobs, William Wheeler, Meredith Yeager, Andrew W. Bergen, Qizhai Li, Dario Consonni, Angela C. Pesatori, Sholom Wacholder, Michael Thun, Ryan Diver, Martin Oken, Jarmo Virtamo, Demetrius Albanes, Zhaoming Wang, Laurie Burdette, Kimberly F. Doheny, Elizabeth W. Pugh, Cathy Laurie, Paul Brennan, Rayjean Hung, Valerie Gaborieau, James D. McKay, Mark Lathrop, John McLaughlin, Ying Wang, Ming-Sound Tsao, Margaret R. Spitz, Yufei Wang, Hans Krokan, Lars Vatten, Frank Skorpen, Egil Arnesen, Simone Benhamou, Christine Bouchard, Andres Metsapalu, Tonu Vooder, Mari Nelis, Kristian Vålk, John K. Field, Chu Chen, Gary Goodman, Patrick Sulem, Gudmar Thorleifsson, Thorunn Rafnar, Timothy Eisen, Wiebke Sauter, Albert Rosenberger, Heike Bickeböller, Angela Risch, Jenny Chang-Claude, H. Erich Wichmann, Kari Stefansson, Richard Houlston, Christopher I. Amos, Joseph F. Fraumeni, Jr., Sharon A. Savage, Pier Alberto Bertazzi, Margaret A. Tucker, Stephen Chanock, and Neil E. Caporaso

### Supplemental Acknowledgments

Below is a complete list of funding agencies for all studies included in this article:

The Environment and Genetics in Lung Cancer Etiology (EAGLE), Prostate, Lung, Colon, Ovary Screening Trial (PLCO), and Alpha-Tocopherol, Beta-Carotene Cancer Prevention (ATBC) studies were supported by the Intramural Research Program of the National Institutes of Health, National Cancer Institute (NCI), Division of Cancer Epidemiology and Genetics. ATBC was also supported by U.S. Public Health Service contracts (N01-CN-45165, N01-RC-45035, and N01-RC-37004) from the NCI.

PLCO was also supported by individual contracts from the NCI to the University of Colorado Denver (NO1-CN-25514), Georgetown University (NO1-CN-25522), the Pacific Health Research Institute (NO1-CN-25515), the Henry Ford Health System (NO1-CN-25512), the University of Minnesota, (NO1-CN-25513), Washington University (NO1-CN-25516), the University of Pittsburgh (NO1-CN-25511), the University of Utah (NO1-CN-25524), the Marshfield Clinic Research Foundation (NO1-CN-25518), the University of Alabama at Birmingham (NO1-CN-75022), Westat, Inc. (NO1-CN-25476), and the University of California, Los Angeles (NO1-CN-25404).

The Cancer Prevention Study-II (CPS-II) Nutrition Cohort was supported by the American Cancer Society.

The NIH Genes, Environment and Health Initiative (GEI) partly funded DNA extraction and statistical analyses (HG-06-033-NCI-01 and RO1HL091172-01), genotyping at the Johns Hopkins University Center for Inherited Disease Research (U01HG004438 and NIH HHSN268200782096C), and study coordination at the GENEVA Coordination Center (U01 HG004446) for the EAGLE study and part of the PLCO. Genotyping for the remaining part of PLCO and all ATBC and CPS-II samples were supported by the Intramural Research Program of the National Institutes of Health, NCI, Division of Cancer Epidemiology and Genetics.

The “Texas” study was supported by NIH grants CA55769, CA127219, R01CA133996, and CA121197.

The Central European study was supported by the Institut National du Cancer (INCa) in France and the U.S. NCI (RO1 CA092039).

The CARET study was supported by NIH grants R01CA78812 and U01CA63673.

LUCY was partly funded by the Deutsche Forschungsgemeinschaft (DFG, BI 576/2-1; BI 576/2-2), and genotyping was funded by the Helmholtz Association in Germany. The Heidelberg sample collection was partly supported by the Deutsche Krebshilfe.

The Estonian study was supported by Targeted Financing from Estonian Government (SF0180142 and ESF 6465) European Union through the European Regional Development Fund in the frame of Centre of Excellence in Genomics and 7 FP Project ECOGENE.

**Figure S1. Illumina Infinium Genotype Cluster Plots Showing the Calling for the Notable SNP, rs2736100**

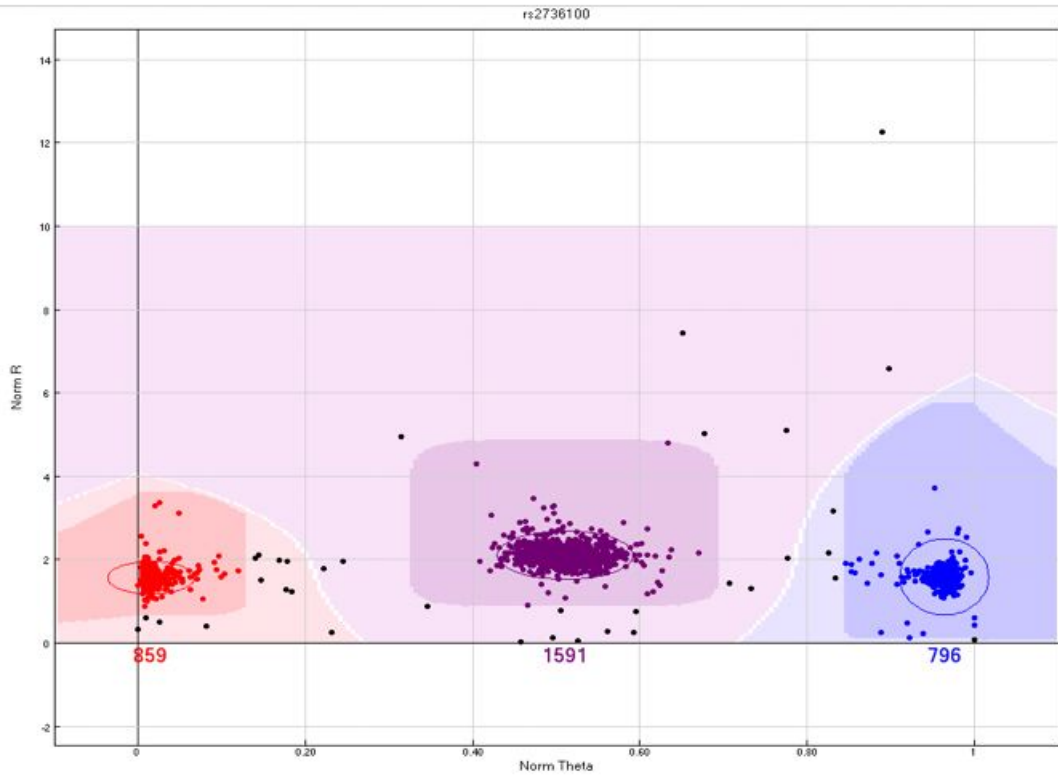

## Figure S2. Lung GWAS QQ Plot of Hardy-Weinberg Proportion

ATBC=Alpha-Tocopherol, Beta-Carotene Cancer Prevention study  
CPSII=Cancer Prevention Study II Nutrition Cohort  
EAGLE=Environment and Genetics in Lung cancer Etiology study  
PLCO=Prostate, Lung, Colon, Ovary Screening Trial

### Hardy-Weinberg Proportion

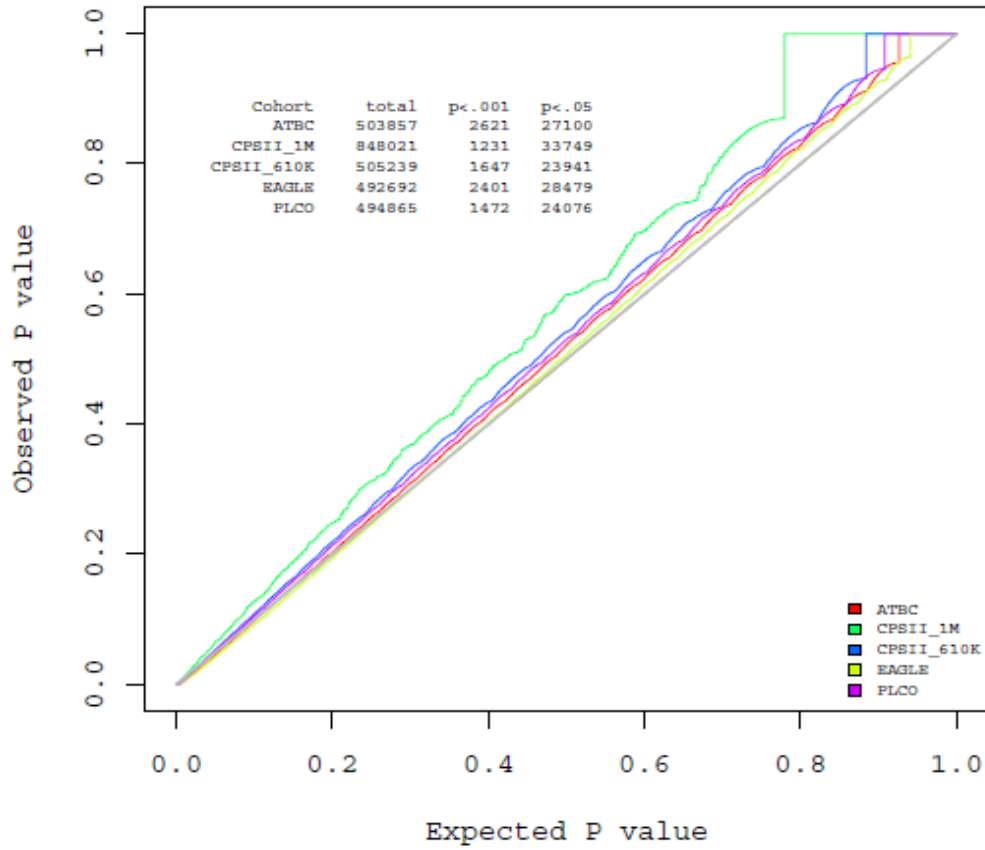

**Figure S3. Lung GWAS Plot of Admixture Defined by Analysis with the STRUCTURE Program**

ATBC=Alpha-Tocopherol, Beta-Carotene Cancer Prevention study  
CPSII=Cancer Prevention Study II Nutrition Cohort  
EAGLE=Environment and Genetics in Lung cancer Etiology study  
PLCO=Prostate, Lung, Colon, Ovary Screening Trial

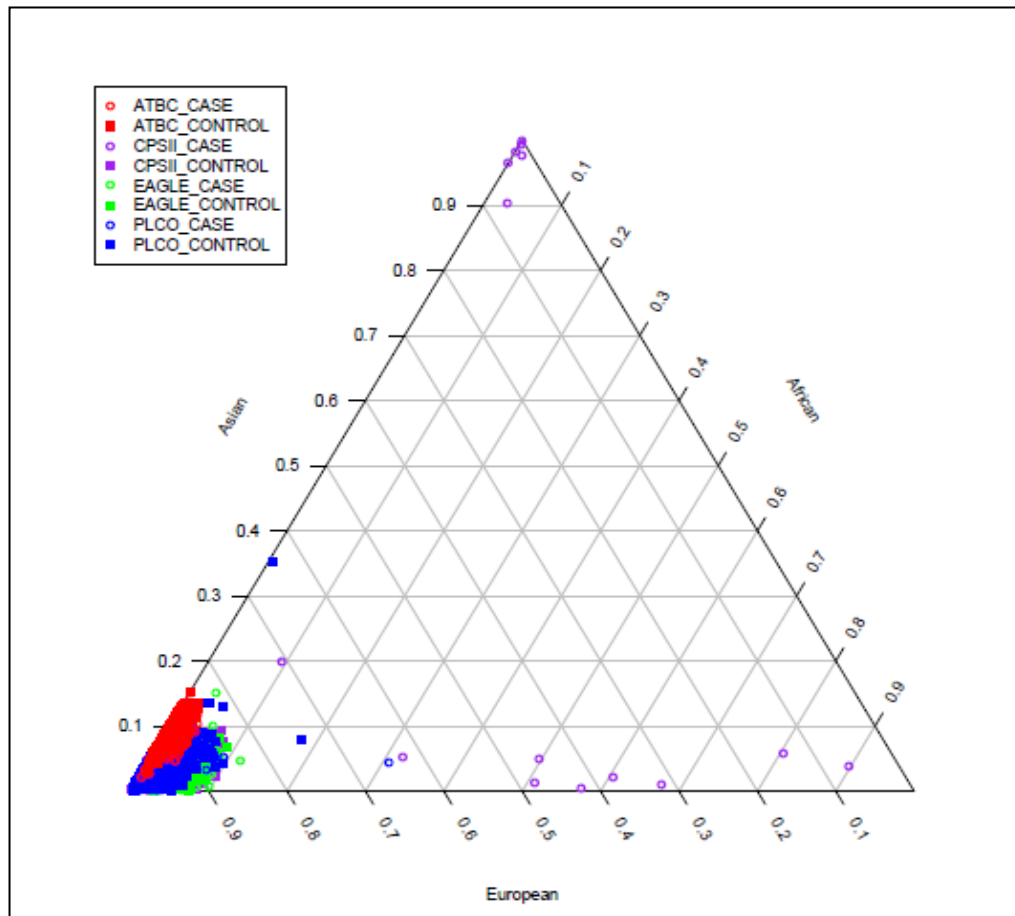

Figure S4A. CPSII\_1M PCA Plot (EV1-EV6)

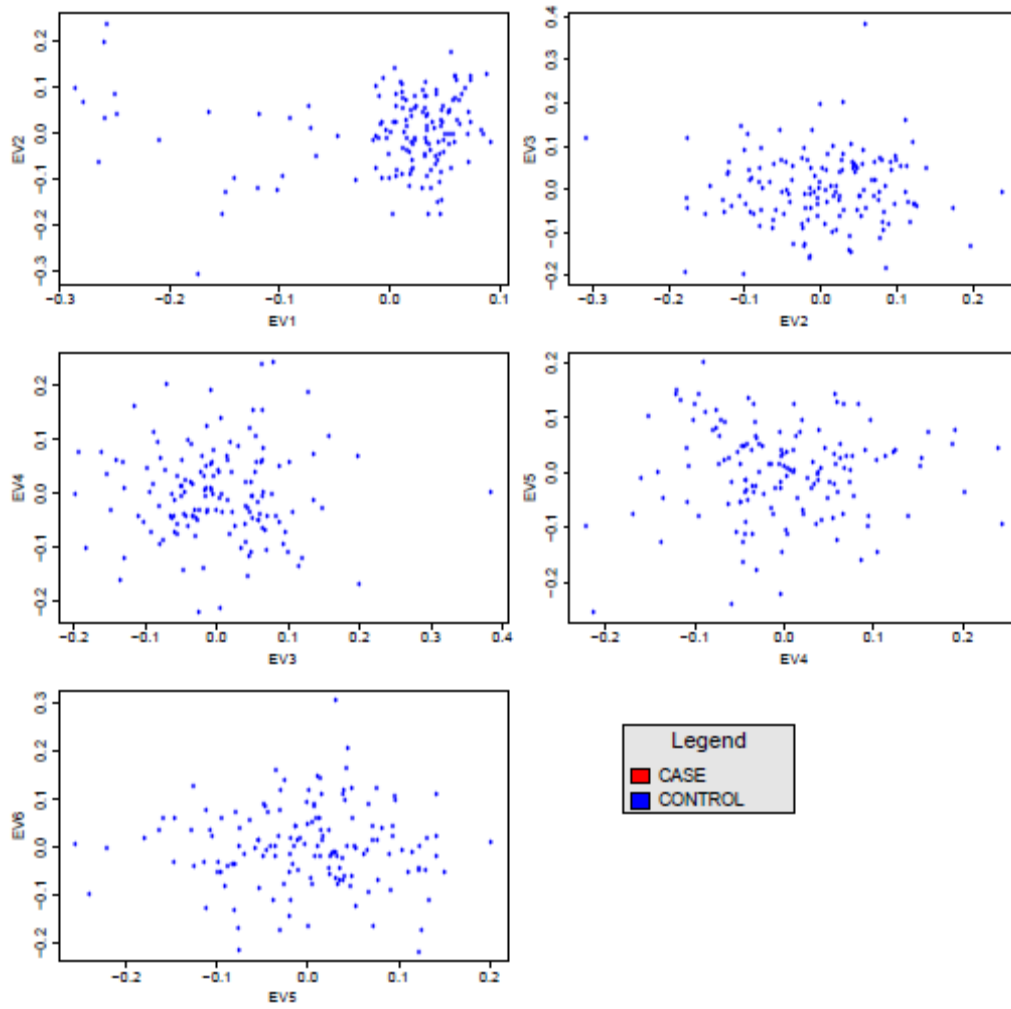

Figure S4B. CPSII\_610K Set PCA Plot (EV1-EV6)

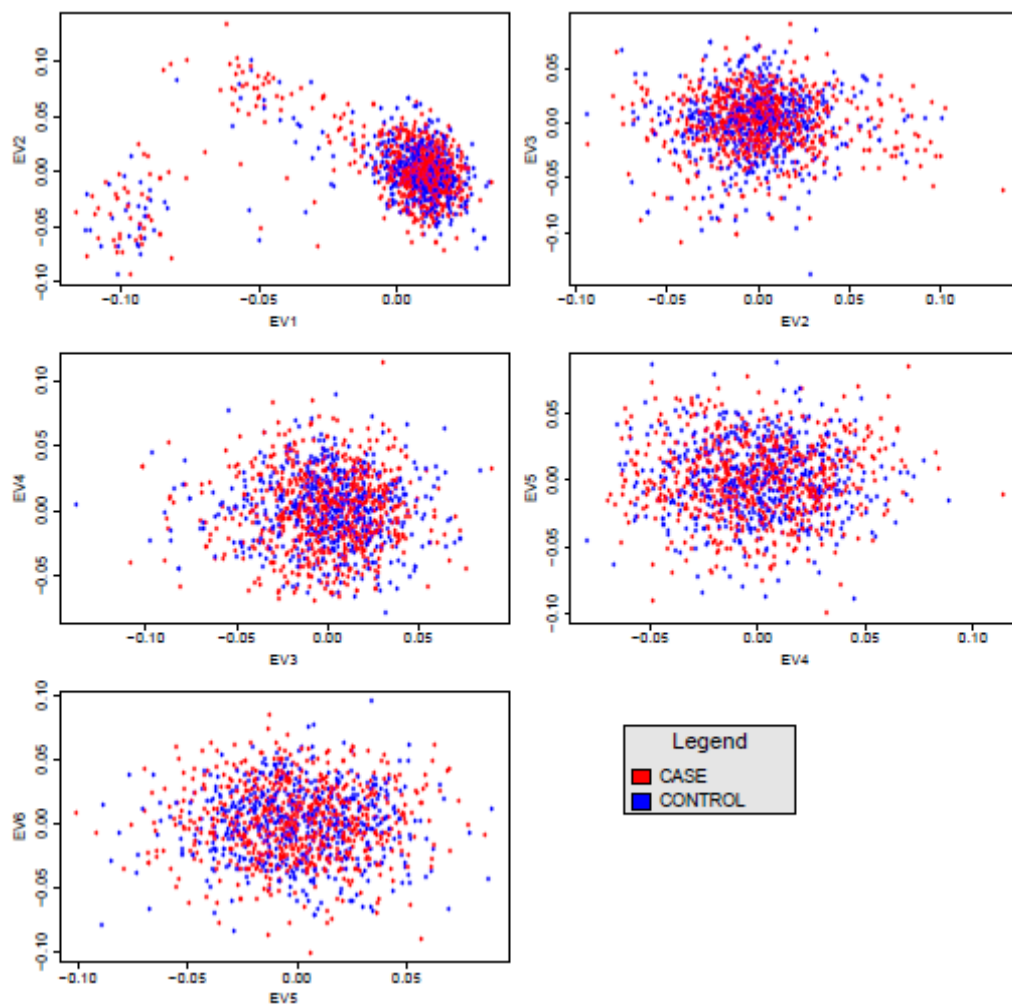

Figure S4C. EAGLE Study PCA Plot (EV1-EV6)

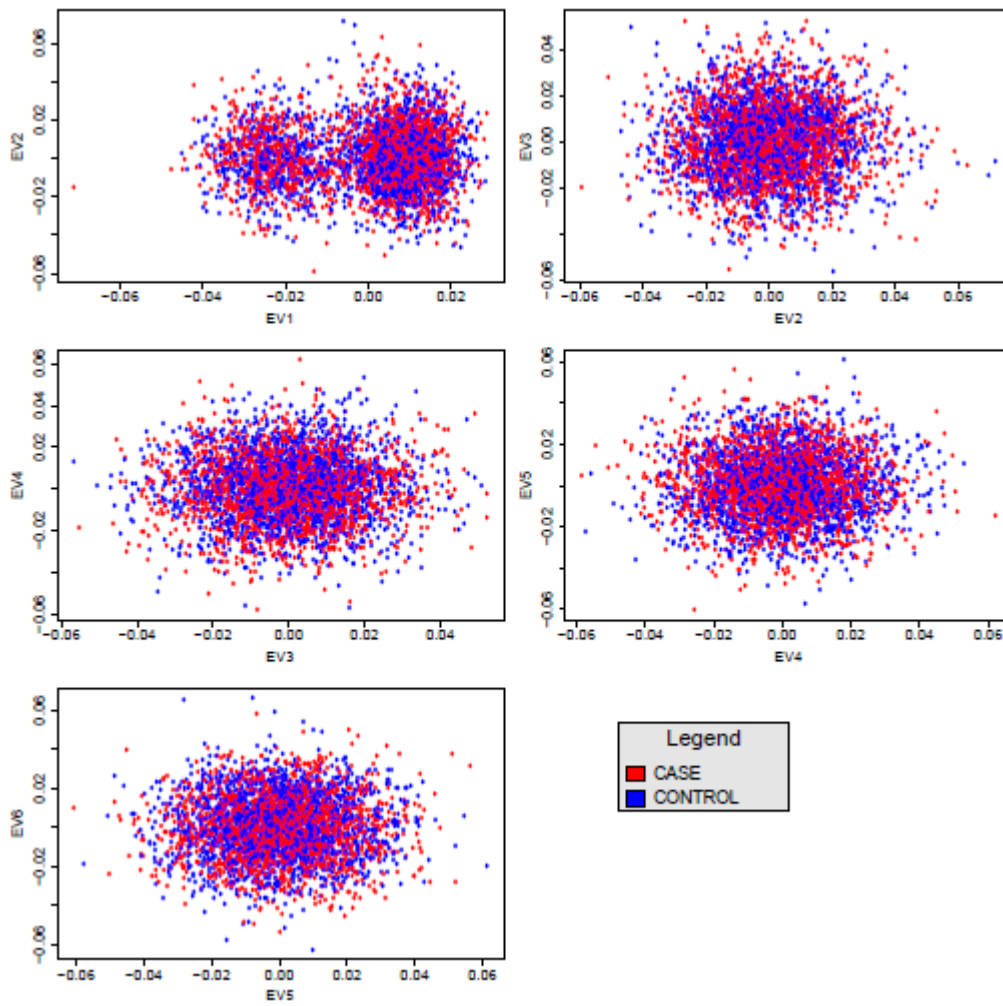

Figure S4D. PLCO PCA Plot (EV1-EV6)

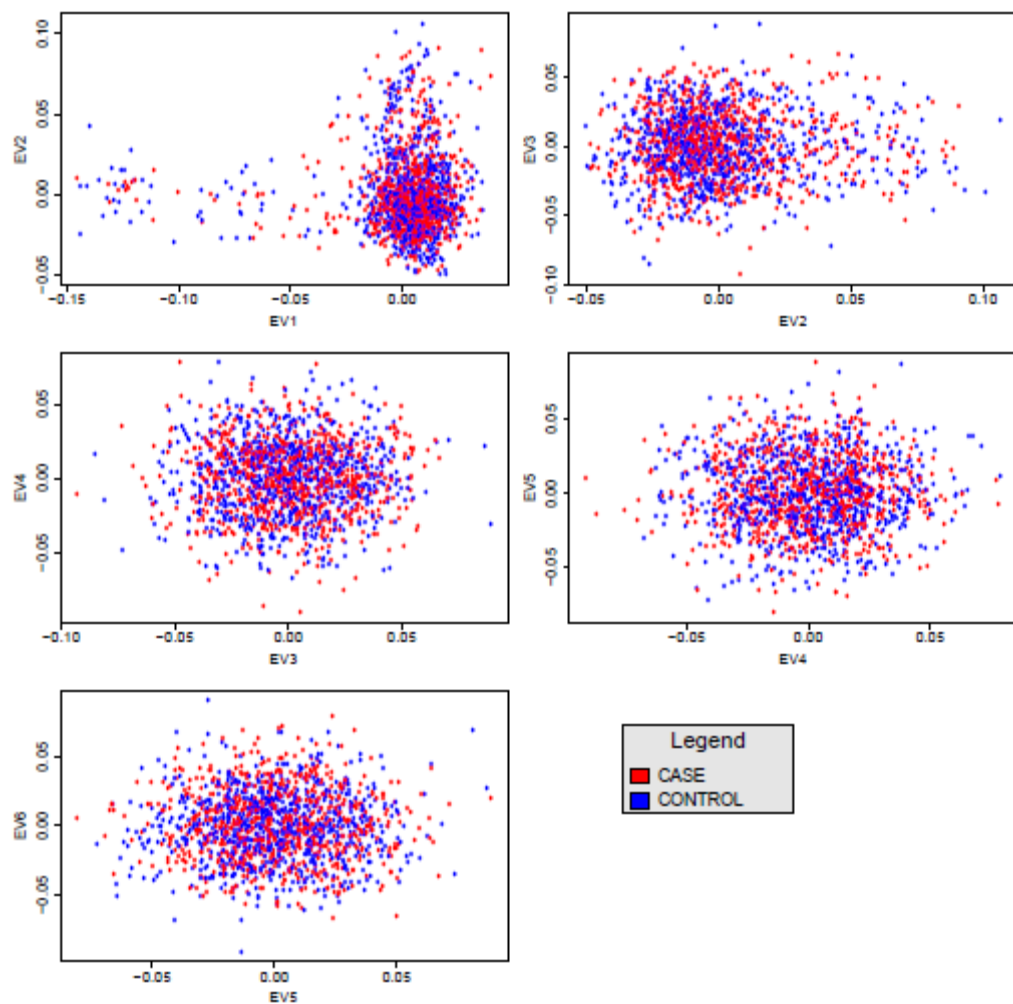



Figure S5A. Quantile-Quantile Plot of P Values for the Environment and Genetics in Lung Cancer Etiology (EAGLE) Study

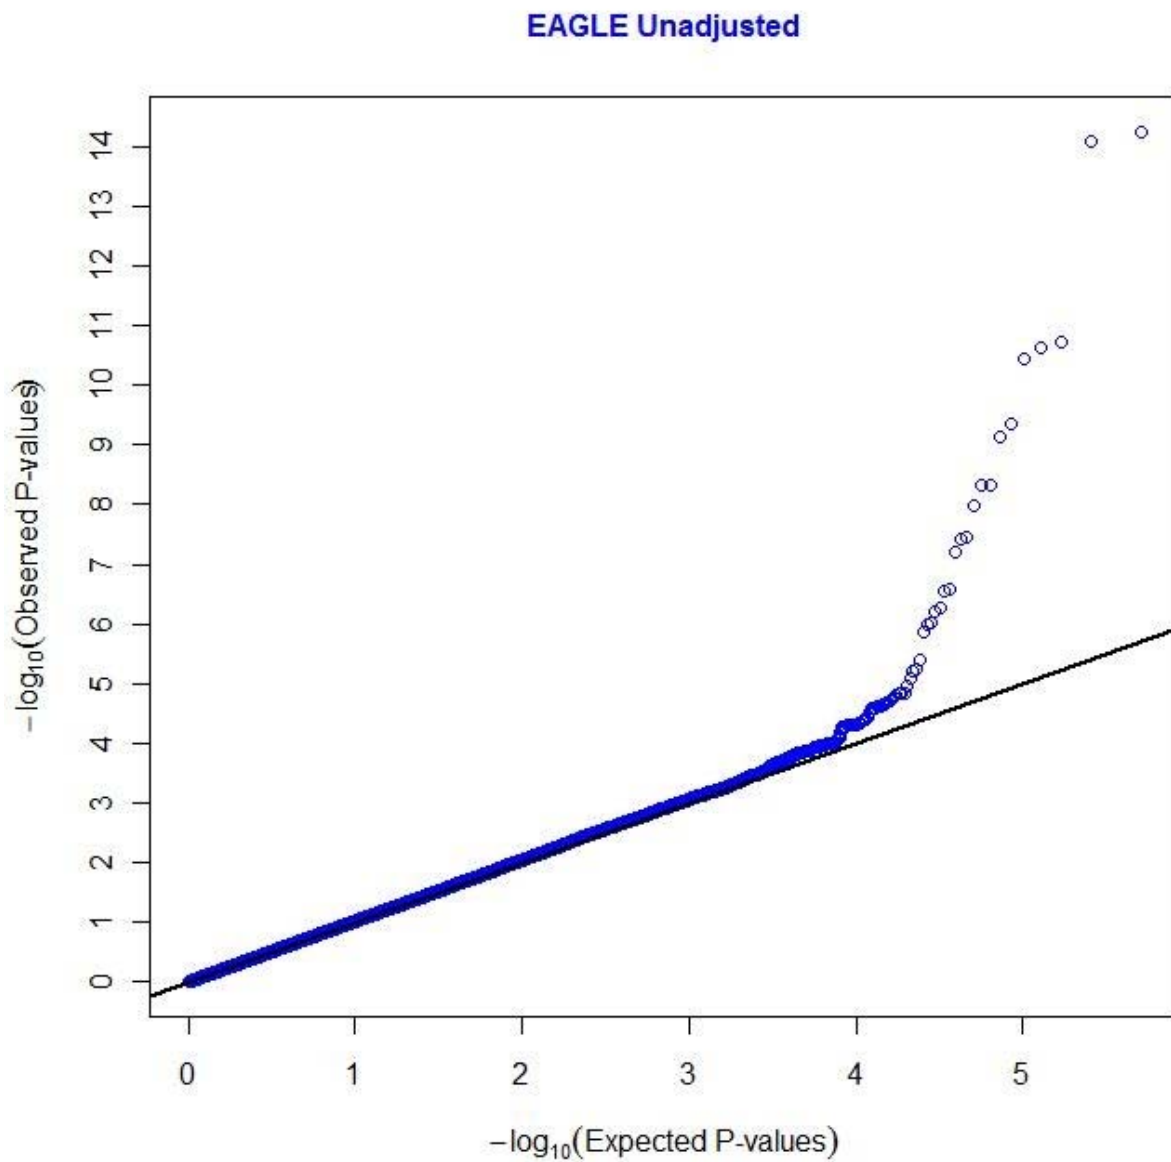

Figure S5B. Quantile-Quantile Plot of P Values for the Alpha-Tocopherol, Beta-Carotene Cancer Prevention Study

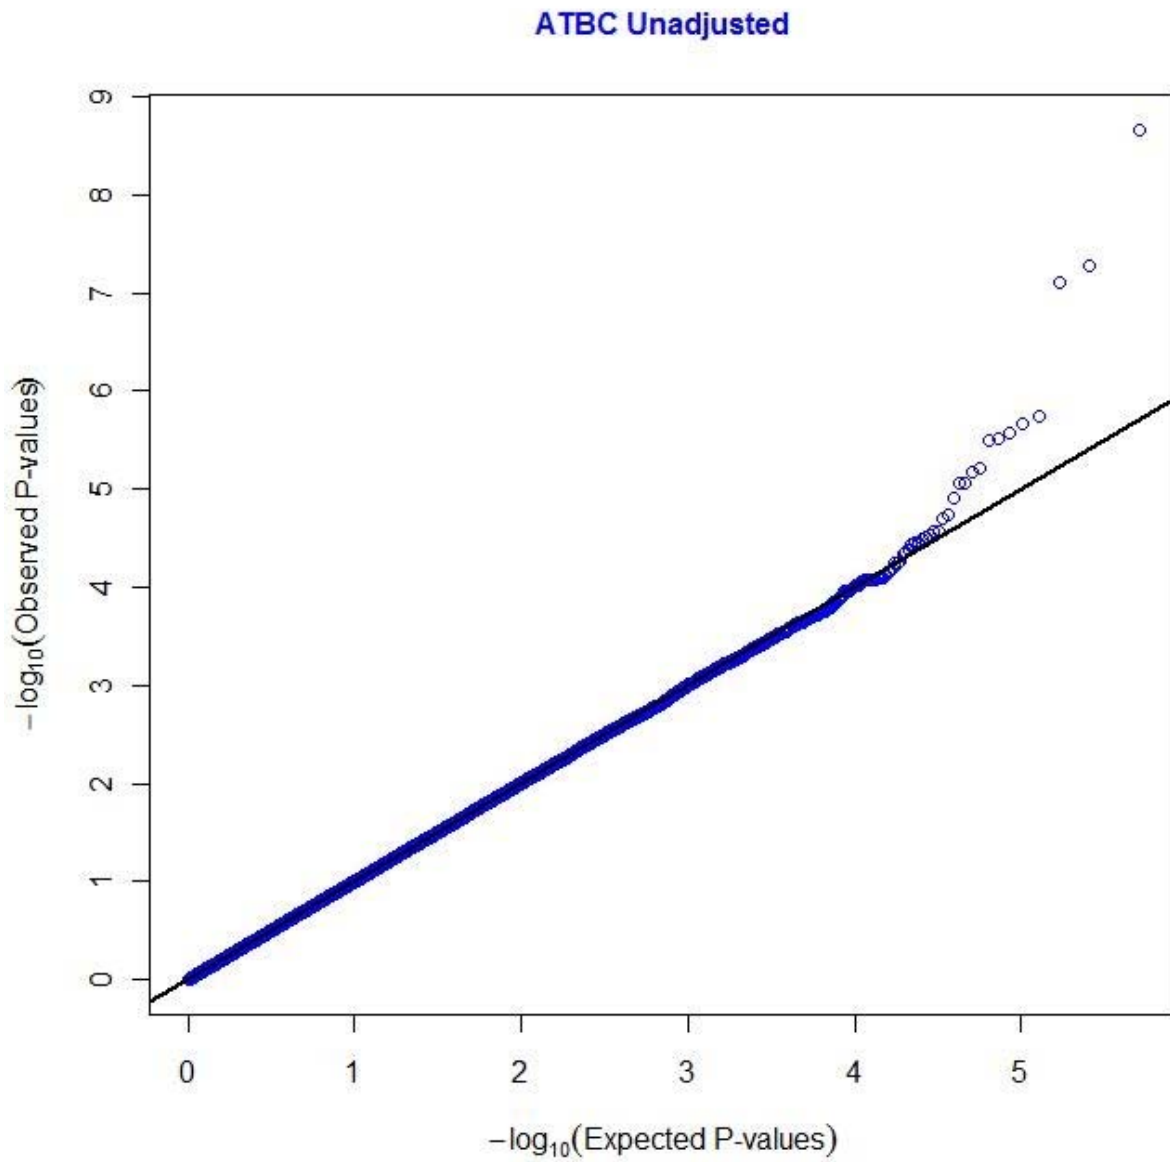

Figure S5C. Quantile-Quantile Plot of P Values for the Prostate, Lung, Colon, Ovary (PLCO) Screening Trial

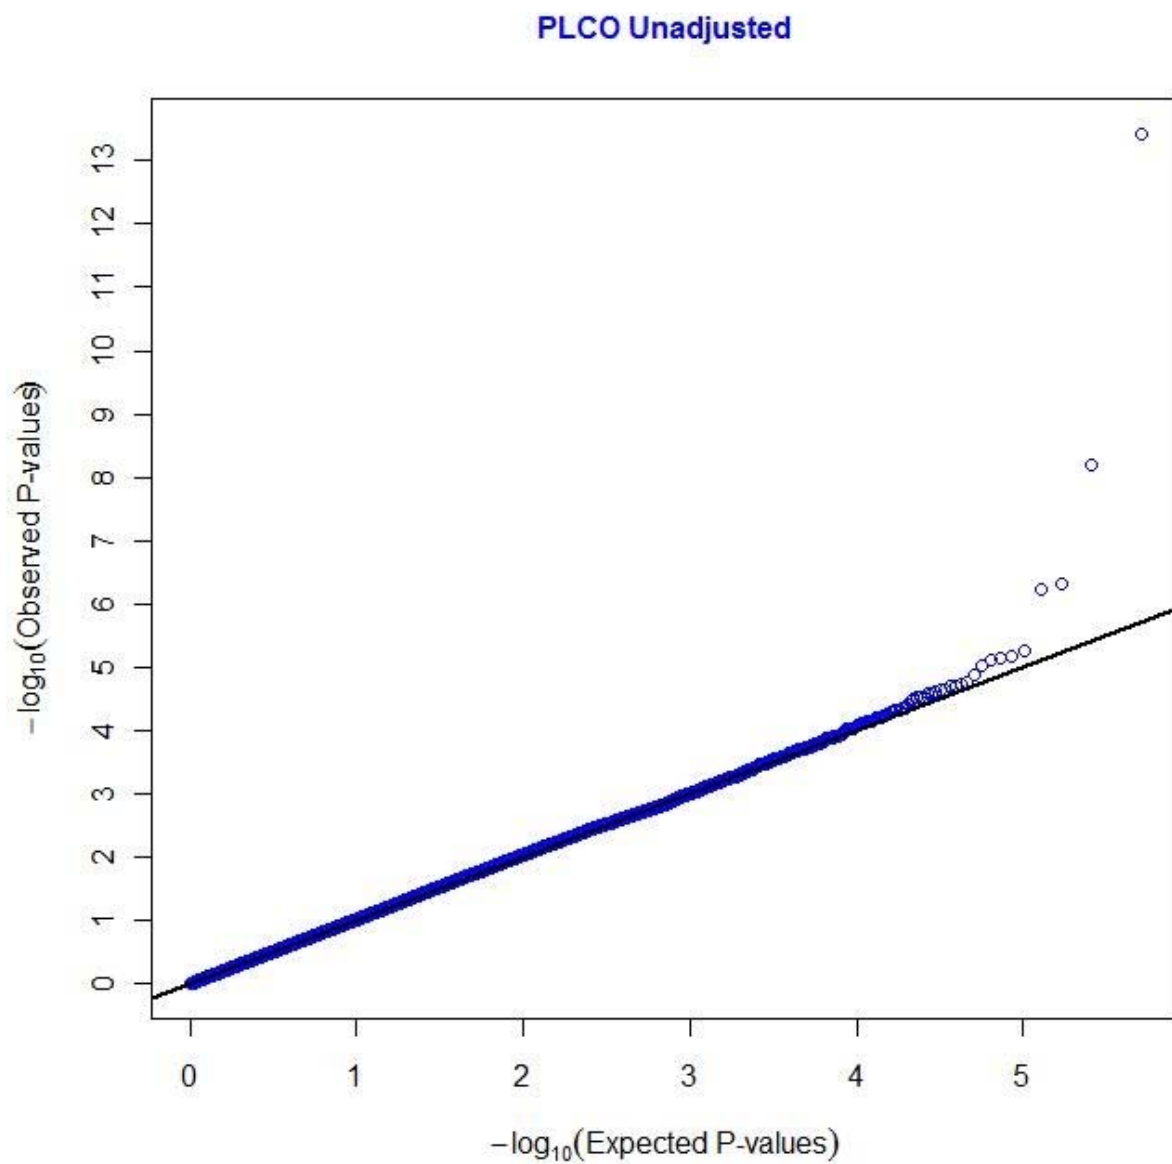

Figure S5D. Quantile-Quantile Plot of P Values for the Cancer Prevention Study II (CPSII) Nutrition Cohort

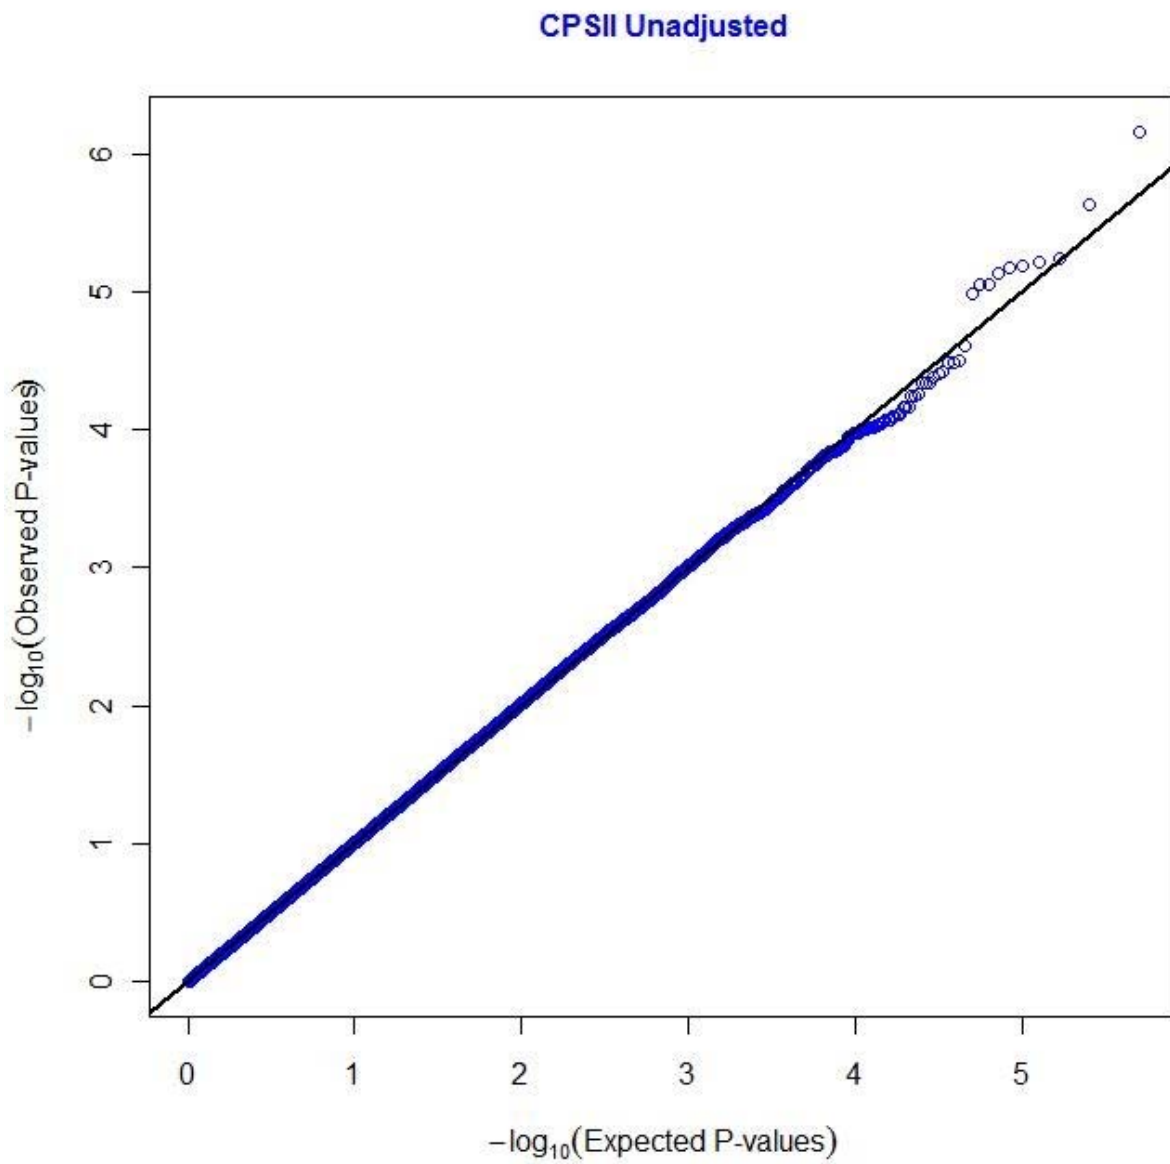

**Table S1. Lung GWAS Subjects after Sample Quality Control**

| <b>STUDY</b>       | <b>PROJECT</b>        | <b>Illumina HapMap</b> | <b>CASES</b> | <b>CONTROLS</b>   | <b>Total</b>      |
|--------------------|-----------------------|------------------------|--------------|-------------------|-------------------|
| EAGLE <sup>a</sup> | GEI <sup>b</sup> Lung | 550K                   | 1955         | 1997              | 3952              |
| ATBC <sup>c</sup>  | Common Controls       | 610Quad                |              | 1286              | 1286              |
| ATBC <sup>c</sup>  | Lung study            | 610 Quad               | 1760         |                   | 1760              |
| ATBC <sup>c</sup>  | PanScan <sup>d</sup>  | 550K                   |              | 208               | 208               |
| PLCO <sup>e</sup>  | GEI <sup>a</sup> Lung | 550K                   | 806          | 859               | 1665              |
| PLCO <sup>e</sup>  | Prostate Controls     | 317K/240K              |              | 1105 <sup>f</sup> | 1105 <sup>f</sup> |
| PLCO <sup>e</sup>  | Lung study            | 610 Quad               | 615          |                   | 615               |
| CPSII <sup>g</sup> | Common Controls       | 1M Duo                 |              | 148               | 148               |
| CPSII <sup>g</sup> | Common Controls       | 610 Quad               |              | 533               | 533               |
| CPSII <sup>g</sup> | Lung study            | 610 Quad               | 721          |                   | 721               |
| CPSII <sup>g</sup> | PanScan <sup>d</sup>  | 550K                   |              | 118               | 118               |
| <b>Grand Total</b> |                       |                        | <b>5857</b>  | <b>6254</b>       | <b>12111</b>      |

<sup>a</sup>Environment and Genetics in Lung Cancer Etiology study

<sup>b</sup>Gene and Environment Health Initiative

<sup>c</sup>Alpha-Tocopherol, Beta-Carotene Cancer Prevention study

<sup>d</sup>Pancreatic Cancer Cohort Consortium

<sup>e</sup>Prostate, Lung, Colon, Ovary Screening Trial

<sup>f</sup>Data from 1,105 PLCO control subjects from HumanHap317 chips after removing samples with low completion rates. Of these, 1,098 PLCO control subjects had also data from HumanHap240 chips.

<sup>g</sup>Cancer Prevention Study II Nutrition Cohort

**Table S2. Subjects Excluded from the Genome-wide Association Analysis**

| <b>Exclusion Criteria</b>                     | <b>Cutoff</b>                                                                                                                                                                     | <b>N. Subjects</b>       |
|-----------------------------------------------|-----------------------------------------------------------------------------------------------------------------------------------------------------------------------------------|--------------------------|
| Overall missing rate <sup>a</sup>             | > 5%                                                                                                                                                                              | 0 <sup>b</sup>           |
| X Chr. missing rate <sup>a</sup>              | ATBC <sup>c</sup> ( > 7% )<br>CPSII <sup>d</sup> _1M ( >5% )<br>CPSII <sup>d</sup> _610K ( >6% )<br>EAGLE <sup>e</sup> , PLCO <sup>f</sup> ( >5% )<br>Sub Total                   | 6<br>0<br>11<br>12<br>29 |
| Autosomal heterozygosity <sup>a</sup>         | ATBC <sup>c</sup> ( > 34% )<br>CPSII <sup>d</sup> _1M ( > 34% )<br>CPSII <sup>d</sup> _610K ( > 34% )<br>EAGLE <sup>e</sup> , PLCO <sup>f</sup> ( > 34% )<br>Sub Total            | 0<br>0<br>1<br>1<br>2    |
| X Chr. heterozygosity for female <sup>a</sup> | CPSII <sup>d</sup> _1M ( > 26% or < 18% )<br>CPSII <sup>d</sup> _610K ( > 35% or < 20% )<br>EAGLE <sup>e</sup> , PLCO <sup>f</sup> ( > 35% or <20% )<br>Sub Total                 | 0<br>1<br>4<br>5         |
| X Chr. Heterozygosity for male <sup>a</sup>   | ATBC <sup>c</sup> ( > 1.2% )<br>CPSII <sup>d</sup> _1M ( > 0.5% )<br>CPSII <sup>d</sup> _610K ( > 0.5% )<br>EAGLE <sup>e</sup> , PLCO <sup>f</sup> ( > 0.5% )<br>Sub Total        | 5<br>0<br>2<br>11<br>18  |
| Female observed as male                       | CPSII <sup>d</sup> _1M ( < 5% )<br>CPSII <sup>d</sup> _610K ( < 5% )<br>EAGLE <sup>e</sup> , PLCO <sup>f</sup> ( < 5%, non-aneuploid )<br>Sub Total                               | 0<br>0<br>13<br>13       |
| Male observed as female                       | ATBC <sup>c</sup> ( > 5% )<br>CPSII <sup>d</sup> _1M ( > 5% )<br>CPSII <sup>d</sup> _610K ( > 5% )<br>EAGLE <sup>e</sup> , PLCO <sup>f</sup> ( > 5%, non-aneuploid )<br>Sub Total | 5<br>0<br>1<br>14<br>20  |
| Unexpected duplicates                         | Genotype concordance > 98%                                                                                                                                                        | 49                       |
| Relative pairs                                | Exclude the one with lower completion                                                                                                                                             | 40                       |
| Estimated CEU admixture                       | < 80%                                                                                                                                                                             | 18                       |
| <b>Total</b>                                  |                                                                                                                                                                                   | <b>183</b>               |

<sup>a</sup>QC exclusions; the others are analytic exclusions

<sup>b</sup>Missing rate filtering was applied at the sample level instead than subject level

<sup>c</sup>Alpha-Tocopherol, Beta-Carotene Cancer Prevention study

<sup>d</sup>Cancer Prevention Study II Nutrition Cohort

<sup>e</sup>Environment and Genetics in Lung Cancer Etiology study

<sup>f</sup>Prostate, Lung, Colon, Ovary Screening Trial

**Table S3\_ Lung GWAS Summary of Locus Exclusions**

| <b>Quality Control Group</b>            | <b>Locus Count<sup>a</sup></b> |
|-----------------------------------------|--------------------------------|
| ATBC <sup>b</sup>                       | 888                            |
| CPSII <sup>c</sup> (HapMap1M)           | 128                            |
| CPSII <sup>c</sup> (HapMap610QUAD)      | 485                            |
| EAGLE <sup>d</sup>                      | 991                            |
| PLCO <sup>e</sup>                       | 410                            |
| PanScan <sup>f</sup> ATBC <sup>b</sup>  | 111                            |
| PanScan <sup>f</sup> CPSII <sup>c</sup> | 16                             |
| Prostate PLCO <sup>e</sup>              | 604                            |
| Total*                                  | 2011                           |

<sup>a</sup>Based on loci with p-values <  $10^{-7}$  for deviation of Hardy Weinberg proportions

<sup>b</sup>Alpha-Tocopherol, Beta-Carotene Cancer Prevention study

<sup>c</sup>Cancer Prevention Study II Nutrition Cohort

<sup>d</sup>Environment and Genetics in Lung Cancer Etiology study

<sup>e</sup>Gene and Environment Health Initiative

<sup>f</sup>Prostate, Lung, Colon, Ovary Screening Trial

<sup>\*</sup>Pancreatic Cancer Cohort Consortium

**Table S4. Association of Selected SNPs on 6p21-6p22 with Lung Cancer Risk Overall and by Histologic Types and Smoking Status**

| Marker <sup>a</sup> , Allele <sup>b</sup> ,<br>Location <sup>c</sup> ,<br>Gene <sup>d</sup> ,<br>MAF <sup>e</sup> | Study                      | Overall<br>NCI data:<br>5848 controls (2384 current,<br>2041 former, 1402 never smokers)<br>5739 cases (3410 current,<br>1946 former, 362 never smokers)<br>Meta-analysis:<br>19666 controls, 13300<br>cases |                             | Adenocarcinoma<br>NCI data:<br>5848 controls (2384 current, 2041<br>former, 1402 never smokers)<br>1730 cases (786 current, 731<br>former, 203 never smokers)<br>Meta-analysis:<br>14933 controls, 3333 ca |                             | Squamous cell carcinoma<br>NCI data:<br>5848 controls (2384 current,<br>2041 former, 1402 never smokers)<br>1400 cases (953 current, 422<br>former, 23 never smokers)<br>Meta-analysis:<br>14933 controls, 2589 cases |                             | Small cell carcinoma<br>NCI data:<br>5848 controls (2384 current,<br>2041 former, 1402 never smokers)<br>678 cases (516 current,<br>152 former, 9 never smokers) <sup>f</sup><br>Meta-analysis:<br>13796 controls, 1418<br>cases |                             |
|-------------------------------------------------------------------------------------------------------------------|----------------------------|--------------------------------------------------------------------------------------------------------------------------------------------------------------------------------------------------------------|-----------------------------|------------------------------------------------------------------------------------------------------------------------------------------------------------------------------------------------------------|-----------------------------|-----------------------------------------------------------------------------------------------------------------------------------------------------------------------------------------------------------------------|-----------------------------|----------------------------------------------------------------------------------------------------------------------------------------------------------------------------------------------------------------------------------|-----------------------------|
|                                                                                                                   |                            | P-value <sup>f</sup>                                                                                                                                                                                         | OR <sup>g</sup><br>(95% CI) | P-value <sup>f</sup>                                                                                                                                                                                       | OR <sup>g</sup><br>(95% CI) | P-value <sup>f</sup>                                                                                                                                                                                                  | OR <sup>g</sup><br>(95% CI) | P-value <sup>f</sup>                                                                                                                                                                                                             | OR <sup>g</sup><br>(95% CI) |
|                                                                                                                   |                            | rs2395471, (G,A)<br>31348671 HLA-<br>C, 0.543/0.455                                                                                                                                                          | NCI_Smoking<br>Unadjusted   | 0.002                                                                                                                                                                                                      | 0.92<br>(0.87, 0.97)        | 0.040                                                                                                                                                                                                                 | 0.92<br>(0.85, 1.00)        | 0.25                                                                                                                                                                                                                             | 0.95<br>(0.87, 1.04)        |
| NCI_Smoking<br>Adjusted                                                                                           | 0.001                      |                                                                                                                                                                                                              | 0.91<br>(0.85, 0.96)        | 0.023                                                                                                                                                                                                      | 0.90<br>(0.83, 0.99)        | 0.086                                                                                                                                                                                                                 | 0.92<br>(0.84, 1.01)        | 0.18                                                                                                                                                                                                                             | 0.92<br>(0.81, 1.04)        |
| NCI_Current<br>smokers                                                                                            | 0.06                       |                                                                                                                                                                                                              | 0.93<br>(0.86, 1.00)        | 0.35                                                                                                                                                                                                       | 0.94<br>(0.83, 1.07)        | 0.41                                                                                                                                                                                                                  | 0.95<br>(0.85, 1.07)        | 0.99                                                                                                                                                                                                                             | 1.00<br>(0.87, 1.15)        |
| NCI_Former<br>smokers                                                                                             | 0.04                       |                                                                                                                                                                                                              | 0.91<br>(0.83, 1.00)        | 0.18                                                                                                                                                                                                       | 0.92<br>(0.81, 1.04)        | 0.47                                                                                                                                                                                                                  | 0.95<br>(0.81, 1.10)        | 0.23                                                                                                                                                                                                                             | 0.86<br>(0.68, 1.10)        |
| NCI_Never<br>smokers                                                                                              | 0.54                       |                                                                                                                                                                                                              | 0.95<br>(0.79, 1.13)        | 0.11                                                                                                                                                                                                       | 0.83<br>(0.67, 1.05)        | 0.54                                                                                                                                                                                                                  | 1.21<br>(0.66, 2.20)        | 0.35                                                                                                                                                                                                                             | 0.61<br>(0.22, 1.71)        |
| Meta-analysis<br>Overall                                                                                          | 6.87x10 <sup>-4</sup>      |                                                                                                                                                                                                              | 0.93<br>(0.89, 0.97)        | 0.031                                                                                                                                                                                                      | 0.93<br>(0.88, 0.99)        | 0.17                                                                                                                                                                                                                  | 0.95<br>(0.88, 1.02)        | 0.45                                                                                                                                                                                                                             | 0.96<br>(0.86, 1.07)        |
| Meta-analysis<br>3 studies <sup>h</sup>                                                                           | 0.001                      |                                                                                                                                                                                                              | 0.93<br>(0.89, 0.97)        |                                                                                                                                                                                                            |                             |                                                                                                                                                                                                                       |                             |                                                                                                                                                                                                                                  |                             |
| rs3117582, (A,C)<br>31728499<br>BAT3, APOM,<br>0.104/0.116                                                        | NCI_Smoking<br>Unadjusted  | 0.001                                                                                                                                                                                                        | 1.16<br>(1.06, 1.27)        | 0.50                                                                                                                                                                                                       | 1.05<br>(0.91, 1.21)        | 0.015                                                                                                                                                                                                                 | 1.20<br>(1.04, 1.38)        | 0.90                                                                                                                                                                                                                             | 0.99<br>(0.79, 1.23)        |
|                                                                                                                   | NCI_Smoking<br>Adjusted    | 0.010                                                                                                                                                                                                        | 1.14<br>(1.03, 1.26)        | 0.43                                                                                                                                                                                                       | 1.06<br>(0.91, 1.23)        | 0.011                                                                                                                                                                                                                 | 1.24<br>(1.05, 1.46)        | 0.27                                                                                                                                                                                                                             | 1.13<br>(0.91, 1.39)        |
|                                                                                                                   | NCI_Current<br>smokers     | 0.03                                                                                                                                                                                                         | 1.16<br>(1.02, 1.32)        | 0.75                                                                                                                                                                                                       | 1.04<br>(0.83, 1.29)        | 0.13                                                                                                                                                                                                                  | 1.16<br>(0.96, 1.39)        | 0.50                                                                                                                                                                                                                             | 1.09<br>(0.86, 1.38)        |
|                                                                                                                   | NCI_Former<br>smokers      | 0.03                                                                                                                                                                                                         | 1.19<br>(1.02, 1.40)        | 0.50                                                                                                                                                                                                       | 1.08<br>(0.86, 1.35)        | 0.17                                                                                                                                                                                                                  | 1.20<br>(0.92, 1.57)        | 0.94                                                                                                                                                                                                                             | 1.02<br>(0.67, 1.55)        |
|                                                                                                                   | NCI_Never<br>smokers       | 0.72                                                                                                                                                                                                         | 0.94<br>(0.68, 1.30)        | 0.78                                                                                                                                                                                                       | 1.06<br>(0.70, 1.59)        | 0.75                                                                                                                                                                                                                  | 1.18<br>(0.42, 3.32)        | 0.27                                                                                                                                                                                                                             | 2.01<br>(0.58, 7.0)         |
|                                                                                                                   | Meta-analysis<br>Overall   | 4.79x10 <sup>-12</sup>                                                                                                                                                                                       | 1.22<br>(1.15, 1.29)        | 0.21                                                                                                                                                                                                       | 1.07<br>(0.96, 1.19)        | 0.017                                                                                                                                                                                                                 | 1.16<br>(1.03, 1.31)        | 0.46                                                                                                                                                                                                                             | 1.07<br>(0.90, 1.27)        |
|                                                                                                                   | Meta-analysis<br>3 studies | 0.001                                                                                                                                                                                                        | 1.13<br>(1.05, 1.22)        |                                                                                                                                                                                                            |                             |                                                                                                                                                                                                                       |                             |                                                                                                                                                                                                                                  |                             |
| rs4324798,<br>(G,A)<br>28884096, TRNAA-<br>UGC, 0.086/0.080                                                       | NCI_Smoking<br>Unadjusted  | 0.057                                                                                                                                                                                                        | 1.11<br>(1.00-1.23)         | 0.68                                                                                                                                                                                                       | 0.97<br>(0.82, 1.14)        | 0.064                                                                                                                                                                                                                 | 1.17<br>(0.99, 1.39)        | 0.31                                                                                                                                                                                                                             | 1.12<br>(0.90, 1.41)        |
|                                                                                                                   | NCI_Smoking<br>Adjusted    | 0.040                                                                                                                                                                                                        | 1.13<br>(1.00-1.26)         | 0.96                                                                                                                                                                                                       | 1.00<br>(0.84, 1.19)        | 0.039                                                                                                                                                                                                                 | 1.22<br>(1.01, 1.47)        | 0.20                                                                                                                                                                                                                             | 1.17<br>(0.92, 1.49)        |



|  |                          |                       |                      |      |                      |      |                      |      |                      |
|--|--------------------------|-----------------------|----------------------|------|----------------------|------|----------------------|------|----------------------|
|  | NCI_Current smokers      | 0.009                 | 1.23<br>(1.05, 1.44) | 0.26 | 1.16<br>(0.90, 1.50) | 0.10 | 1.21<br>(0.96, 1.51) | 0.35 | 1.15<br>(0.86, 1.52) |
|  | NCI_Former smokers       | 0.75                  | 1.02<br>(0.86, 1.23) | 0.42 | 0.90<br>(0.70, 1.16) | 0.52 | 1.10<br>(0.82, 1.48) | 0.26 | 1.27<br>(0.84, 1.94) |
|  | NCI_Never smokers        | 0.61                  | 0.91<br>(0.64, 1.29) | 0.31 | 0.78<br>(0.48, 1.26) | 0.59 | 0.68<br>(0.16, 2.82) | 0.58 | 1.52<br>(0.35, 6.65) |
|  | Meta-analysis Unadjusted | 1.74x10 <sup>-8</sup> | 1.16<br>(1.09-1.24)  | 0.96 | 1.00<br>(0.88, 1.12) | 0.17 | 1.10<br>(0.96, 1.27) | 0.26 | 1.12<br>(0.92, 1.37) |
|  | Meta-analysis 3 Studies  | 0.04                  | 1.09<br>(1.00, 1.18) |      |                      |      |                      |      |                      |

SNPs identified as relevant for lung cancer risk in previous studies are shown. The lung cancer cases in the Overall analyses include adenocarcinomas, squamous cell carcinomas, small cell carcinomas, and other groups of different histologic types or mixed histologies. The Overall meta-analyses include four NCI GWAS studies plus ten additional studies; the meta-analyses in the three major histologic types include four NCI GWAS studies plus three replication studies. Results for each SNP are shown following this order: Top row (NCI Smoking Unadjusted), results from the NCI GWAS data adjusted for age in five-year intervals (defined as age-at-diagnosis/interview for case-control study and age at baseline for cohort study), gender, study (EAGLE, PLCO, ATBC, CPS-II) and four principal components for population stratification within studies (two for PLCO, and one each for EAGLE and ATBC). Adjustment for the same variables plus smoking status (current, former, never), cigarettes smoked per day ( $\leq 10, 11-20, 21-30, 31-40, 41+$ ), duration in ten-year intervals and number of years since quitting (1-5, 6-10, 11-20, 21-30, 30+) for former smokers showed virtually identical results (data not shown). Second row (NCI Current smokers), results from the NCI GWAS data restricted to current smoker subjects, adjusted for the same variables of the top row. Third row (NCI Former smokers), results from the NCI GWAS data restricted to former smoker subjects who quit smoking >6 months prior to the study, adjusted for the same variables of the top row. Fourth row (NCI Never smokers), results from the NCI GWAS data restricted to never smoker subjects who smoked <100 cigarettes in their lifetime, adjusted for the same variables of the top row. Bottom row (Meta-analysis Overall), results from the meta-analysis combining NCI GWAS data and 10 additional studies, unadjusted models. Bottom row (Meta-analysis 3 Studies), results from the meta-analysis combining NCI GWAS data and 3 additional studies included in the analyses stratified by histology, unadjusted models.

The first two SNPs are on chromosome 6p21, the last SNP is on chromosome 6p22.

<sup>a</sup>NCBI dbSNP identifier.

<sup>b</sup>Major allele, minor allele.

<sup>c</sup>Chromosome and NCBI Human genome Build 36 location.

<sup>d</sup>Gene neighborhood within 20 kb upstream and 10 kb downstream of SNP.

<sup>e</sup>Minor allele frequency in controls/cases.

<sup>f</sup>Subjects categorized by smoking status; sm=smokers

<sup>g</sup>1d.f. Wald test.

<sup>h</sup>OR, per-allele odds ratio; CI, 95% confidence interval.
